# Supplementary material for: NSAIDs, statins, low-dose aspirin and PPIs, and the risk of oesophageal adenocarcinoma among patients with Barrett's oesophagus: a population-based case–control study
Source: HighWire-hosted journal article supplement (doi:10.1136/bmjopen-2014-006640), 2015-01-01
Supplement: bmjopen-2014-006640supp.pdf [file bmjopen-2014-006640supp.pdf]

## Appendix

**Appendix Table 1:** Corresponding Read codes for identification of Barrett's oesophagus and oesophageal adenocarcinoma in THIN database.

| READ code       | Description of code                                          |                | READ code | Description of code                     | Event                      |
|-----------------|--------------------------------------------------------------|----------------|-----------|-----------------------------------------|----------------------------|
| J101611         | Barrett's oesophagus                                         |                |           |                                         | BO                         |
| J102500         | Barrett's ulcer of oesophagus                                |                |           |                                         | BO                         |
| J10y600         | Barrett's oesophagus                                         |                |           |                                         | BO                         |
| B102.00         | Malignant neoplasm of abdominal oesophagus                   |                |           |                                         | Specific algorithm OAC     |
| B105.00         | Malignant neoplasm of lower third oesophagus                 |                |           |                                         | Specific algorithm OAC     |
| B106.00         | Malignant neoplasm, overlapping lesion of oesophagus         |                |           |                                         | Specific algorithm OAC     |
| B10y.00         | Malignant neoplasm of other specified part of oesophagus     |                |           |                                         | Specific algorithm OAC     |
| B10z.00         | Malignant neoplasm of oesophagus NOS                         |                |           |                                         | Specific algorithm OAC     |
| B110100         | Malignant neoplasm of gastro-oesophageal junction of stomach |                |           |                                         | Specific algorithm OAC     |
| B110111         | Malignant neoplasm of gastro-oesophageal junction            |                |           |                                         | Specific algorithm OAC     |
| B10..00/B10z.11 | Malignant neoplasm of oesophagus / Oesophageal cancer        | Combined with: | BBB2.00   | Adenocarcinoma with squamous metaplasia | Unspecific algorithm OAC * |
|                 |                                                              |                | BB57.00   | Adenocarcinoma, intestinal type         |                            |
|                 |                                                              |                | BB53.00   | Adenocarcinoma, metastatic, NOS         |                            |
|                 |                                                              |                | BB5..11   | Adenocarcinomas                         |                            |
|                 |                                                              |                | BB5z.00   | Adenoma or adenocarcinoma NOS           |                            |

BO, Barrett's oesophagus; OAC, oesophageal adenocarcinoma.

\* Recording of the combination of the two codes should have occurred within 1 year of each other.
